# Supplementary material for: Expression Profile and Prognostic Values of CDH Family Members in Lung Adenocarcinoma
Source: Hindawi journal article supplement (doi:10.1155/2022/9644466), 2022-02-11
Supplement: f5 [file 9644466.f5.pdf]

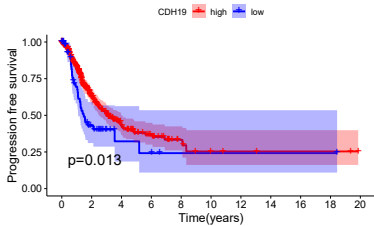

CDH19

|      |     |     |    |    |   |    |    |    |    |    |    |
|------|-----|-----|----|----|---|----|----|----|----|----|----|
| high | 444 | 142 | 51 | 25 | 9 | 4  | 3  | 2  | 2  | 2  | 0  |
| low  | 62  | 17  | 4  | 3  | 1 | 1  | 1  | 1  | 1  | 1  | 0  |
|      | 0   | 2   | 4  | 6  | 8 | 10 | 12 | 14 | 16 | 18 | 20 |

Time(years)

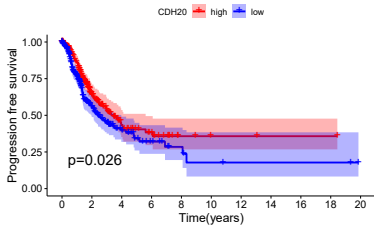

CDH20

|      |     |    |    |    |   |    |    |    |    |    |    |
|------|-----|----|----|----|---|----|----|----|----|----|----|
| high | 261 | 83 | 29 | 16 | 4 | 2  | 2  | 1  | 1  | 1  | 0  |
| low  | 245 | 76 | 26 | 12 | 6 | 3  | 2  | 2  | 2  | 2  | 0  |
|      | 0   | 2  | 4  | 6  | 8 | 10 | 12 | 14 | 16 | 18 | 20 |

Time(years)

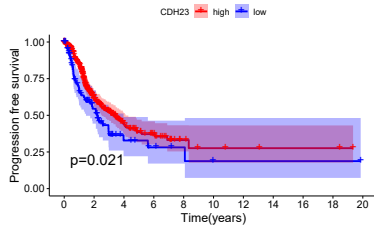

CDH23

|      |     |     |    |    |   |    |    |    |    |    |    |
|------|-----|-----|----|----|---|----|----|----|----|----|----|
| high | 412 | 127 | 46 | 23 | 7 | 4  | 3  | 2  | 2  | 2  | 0  |
| low  | 94  | 32  | 9  | 5  | 3 | 1  | 1  | 1  | 1  | 1  | 0  |
|      | 0   | 2   | 4  | 6  | 8 | 10 | 12 | 14 | 16 | 18 | 20 |

Time(years)

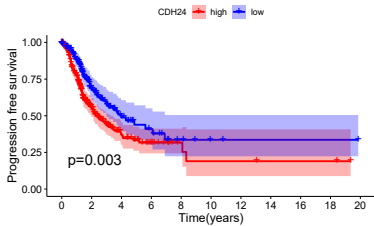

CDH24

|      |     |    |    |    |   |    |    |    |    |    |    |
|------|-----|----|----|----|---|----|----|----|----|----|----|
| high | 315 | 89 | 30 | 15 | 5 | 3  | 3  | 2  | 2  | 2  | 0  |
| low  | 191 | 70 | 25 | 13 | 5 | 2  | 1  | 1  | 1  | 1  | 0  |
|      | 0   | 2  | 4  | 6  | 8 | 10 | 12 | 14 | 16 | 18 | 20 |

Time(years)

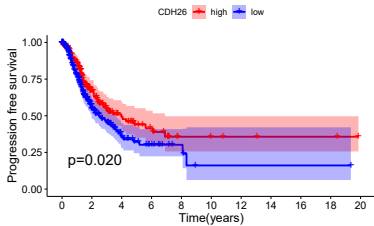

CDH26

|      |     |    |    |    |   |    |    |    |    |    |    |
|------|-----|----|----|----|---|----|----|----|----|----|----|
| high | 215 | 82 | 30 | 16 | 5 | 4  | 3  | 2  | 2  | 2  | 0  |
| low  | 291 | 77 | 25 | 12 | 5 | 1  | 1  | 1  | 1  | 1  | 0  |
|      | 0   | 2  | 4  | 6  | 8 | 10 | 12 | 14 | 16 | 18 | 20 |

Time(years)
