# Supplementary figures and images for: Expression Profile and Prognostic Values of CDH Family Members in Lung Adenocarcinoma
Source: Hindawi journal article supplement (doi:10.1155/2022/9644466), 2022-02-11

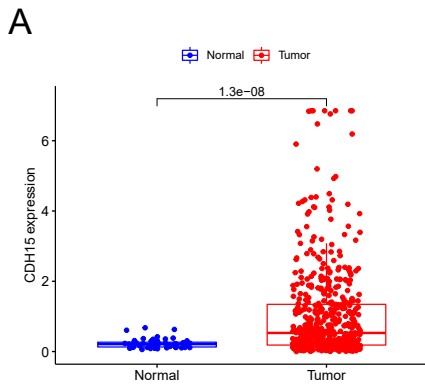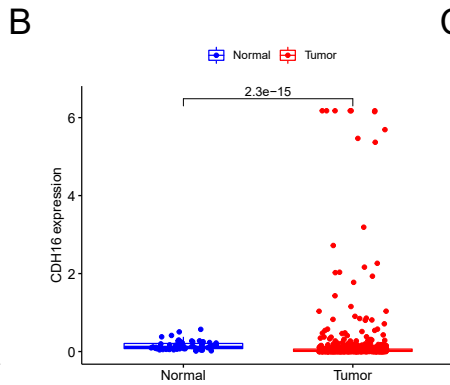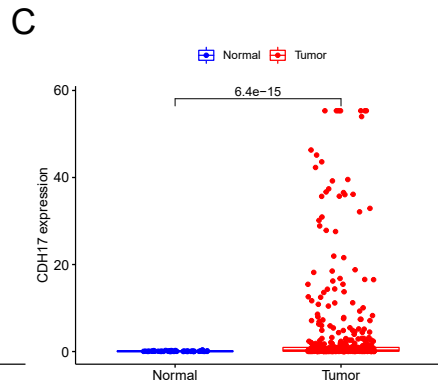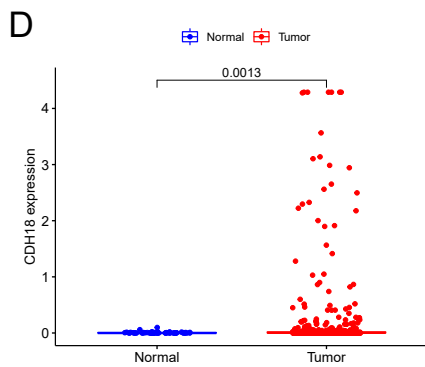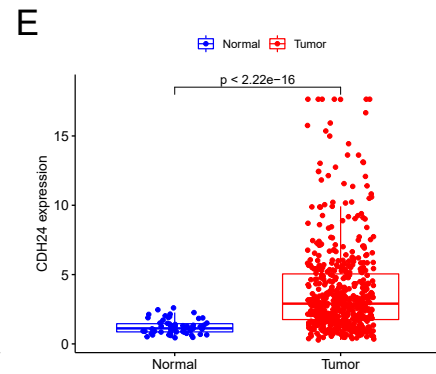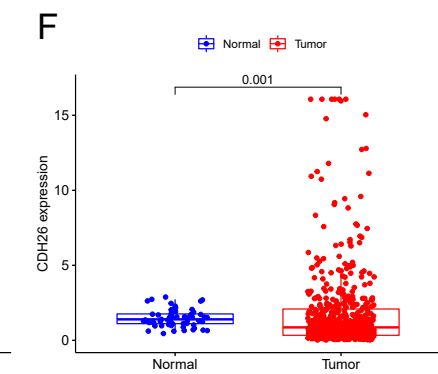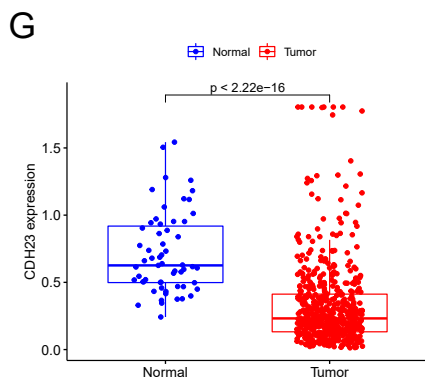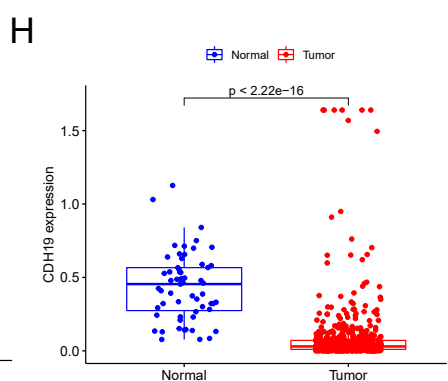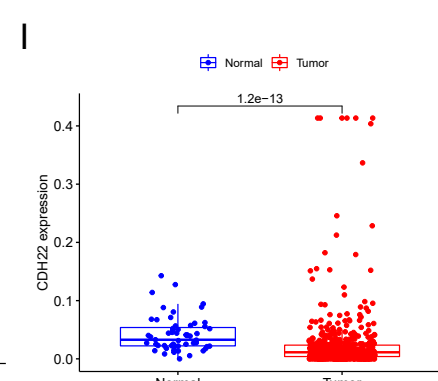

Supplement: f1 [file 9644466.f1.pdf]

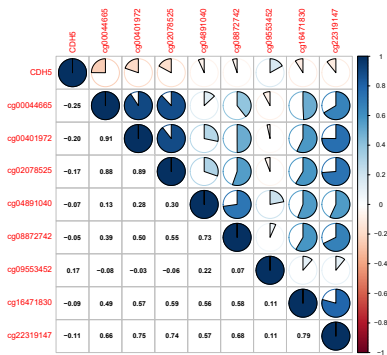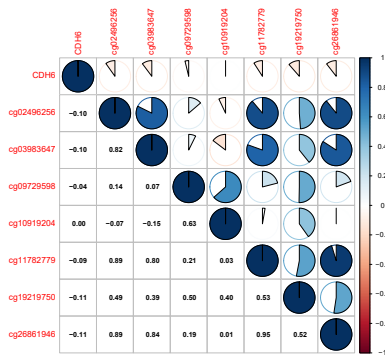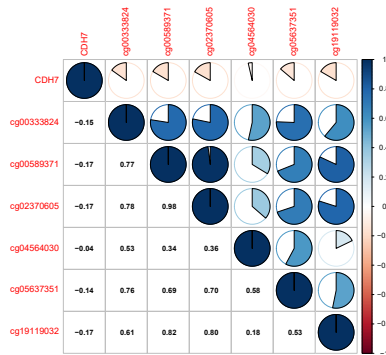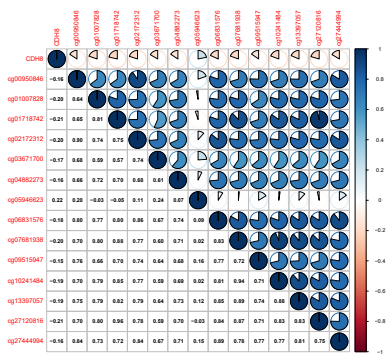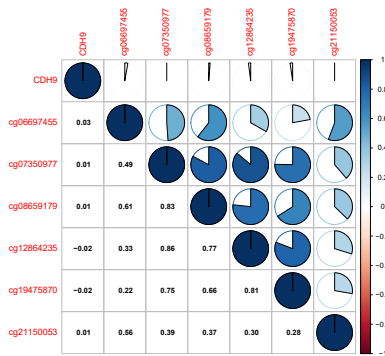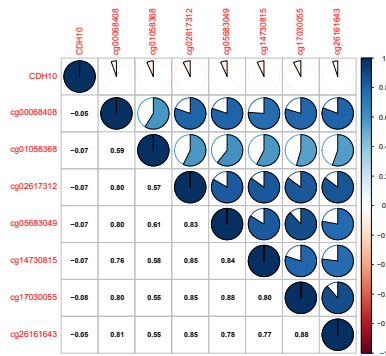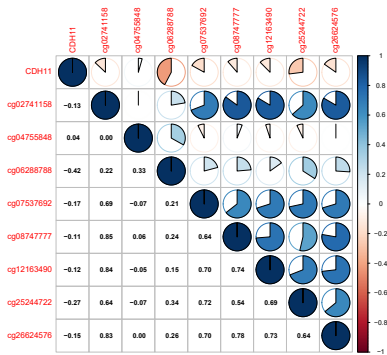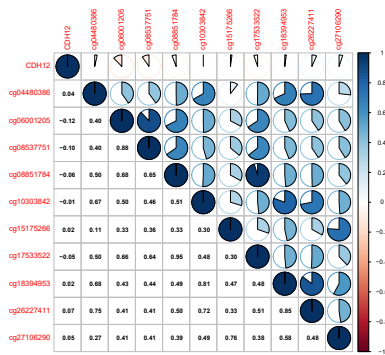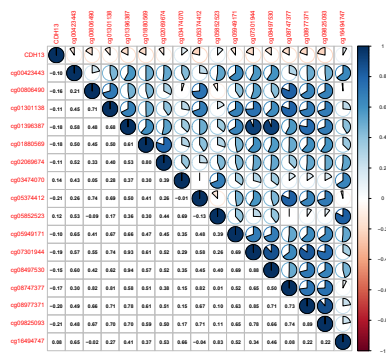

Supplement: f2 [file 9644466.f2.pdf]

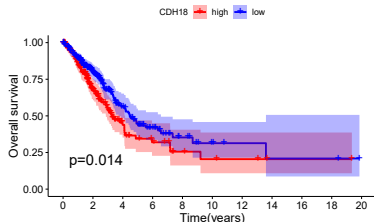

|      |     |     |    |    |    |    |    |    |    |    |    |
|------|-----|-----|----|----|----|----|----|----|----|----|----|
| high | 212 | 86  | 24 | 13 | 6  | 4  | 3  | 1  | 1  | 1  | 0  |
| low  | 288 | 133 | 52 | 26 | 11 | 6  | 3  | 2  | 2  | 2  | 0  |
|      | 0   | 2   | 4  | 6  | 8  | 10 | 12 | 14 | 16 | 18 | 20 |

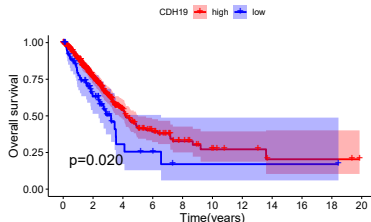

|      |     |     |    |    |    |    |    |    |    |    |    |
|------|-----|-----|----|----|----|----|----|----|----|----|----|
| high | 437 | 192 | 70 | 34 | 16 | 8  | 5  | 2  | 2  | 2  | 0  |
| low  | 63  | 27  | 6  | 4  | 1  | 1  | 1  | 1  | 1  | 1  | 0  |
|      | 0   | 2   | 4  | 6  | 8  | 10 | 12 | 14 | 16 | 18 | 20 |

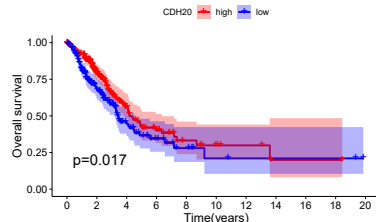

|      |     |     |    |    |    |    |    |    |    |    |    |
|------|-----|-----|----|----|----|----|----|----|----|----|----|
| high | 284 | 126 | 46 | 24 | 10 | 6  | 4  | 1  | 1  | 1  | 0  |
| low  | 216 | 93  | 30 | 14 | 7  | 3  | 2  | 2  | 2  | 2  | 0  |
|      | 0   | 2   | 4  | 6  | 8  | 10 | 12 | 14 | 16 | 18 | 20 |

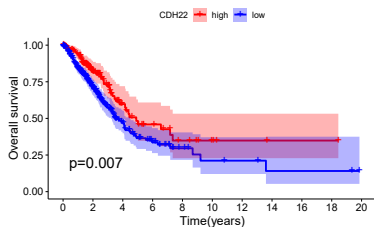

|      |     |     |    |    |   |    |    |    |    |    |    |
|------|-----|-----|----|----|---|----|----|----|----|----|----|
| high | 166 | 77  | 27 | 15 | 8 | 4  | 2  | 1  | 1  | 1  | 0  |
| low  | 334 | 142 | 49 | 23 | 9 | 5  | 4  | 2  | 2  | 2  | 0  |
|      | 0   | 2   | 4  | 6  | 8 | 10 | 12 | 14 | 16 | 18 | 20 |

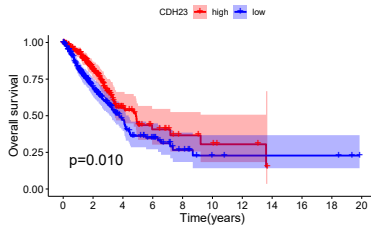

|      |     |     |    |    |    |    |    |    |    |    |    |
|------|-----|-----|----|----|----|----|----|----|----|----|----|
| high | 235 | 105 | 32 | 14 | 7  | 5  | 3  | 0  | 0  | 0  | 0  |
| low  | 265 | 114 | 44 | 24 | 10 | 4  | 3  | 0  | 0  | 0  | 0  |
|      | 0   | 2   | 4  | 6  | 8  | 10 | 12 | 14 | 16 | 18 | 20 |

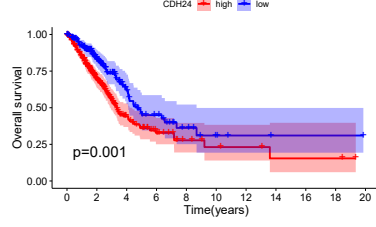

|      |     |     |    |    |   |    |    |    |    |    |    |
|------|-----|-----|----|----|---|----|----|----|----|----|----|
| high | 306 | 122 | 40 | 19 | 8 | 5  | 4  | 2  | 2  | 2  | 0  |
| low  | 194 | 97  | 36 | 19 | 9 | 4  | 2  | 1  | 1  | 1  | 0  |
|      | 0   | 2   | 4  | 6  | 8 | 10 | 12 | 14 | 16 | 18 | 20 |

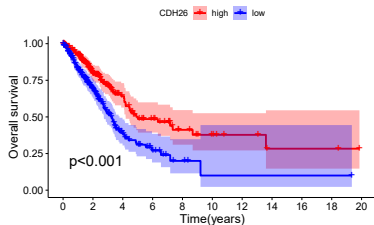

|      |     |     |    |    |    |    |    |    |    |    |    |
|------|-----|-----|----|----|----|----|----|----|----|----|----|
| high | 252 | 120 | 47 | 26 | 13 | 8  | 5  | 2  | 2  | 2  | 0  |
| low  | 248 | 99  | 29 | 12 | 4  | 1  | 1  | 1  | 1  | 1  | 0  |
|      | 0   | 2   | 4  | 6  | 8  | 10 | 12 | 14 | 16 | 18 | 20 |

Supplement: f4 [file 9644466.f4.pdf]
